# Supplementary material for: Discovery of a novel cardiac-specific myosin modulator using artificial intelligence-based virtual screening
Source: PubMed Central journal article supplement (PMC10673995; doi:10.1038/s41467-023-43538-y), 2023-11-24
Supplement: 41467_2023_43538_MOESM1_ESM.pdf [file 41467_2023_43538_MOESM1_ESM.pdf]

# Supplementary Information

## Discovery of a novel cardiac-specific myosin modulator using artificial intelligence-based virtual screening

Priyanka Parijat<sup>1</sup>, Seetharamaiah Atilli<sup>1</sup>, Zoe Hoare<sup>2</sup>, Michael Shattock<sup>2</sup>, Victor Kenyon<sup>3</sup> and Thomas Kampourakis<sup>1,\*</sup>

<sup>1</sup>Randall Centre for Cell and Molecular Biophysics; and British Heart Foundation Centre of Research Excellence, King's College London, London, SE1 1UL, United Kingdom

<sup>2</sup>School of Cardiovascular and Metabolic Medicine and Sciences; Rayne Institute and British Heart Foundation Centre of Research Excellence, King's College London, London, SE5 9NU, United Kingdom

<sup>3</sup>Atomwise Inc., San Francisco, California, USA

## Supplementary Information Figures and Figure Legends

```

SP|P12883|MYH7_HUMAN AETEYGKTVTKEDQVMQQNPPKFDKIEDMAMLTFLHEPAVLYNLKDRYGSWMIYYSGL 120
SP|Q9BE39|MYH7_BOVIN AETEYGKTVTKEDQVLQQNPPKFDKIEDMAMLTFLHEPAVLYNLKERYASWMIYYSGL 120
SP|P02563|MYH6_RAT AETENGKTVTKEDQVMQQNPPKFDKIEDMAMLTFLHEPAVLYNLKERYAAWMIYYSGL 119
      ****  *****:*****:*****:*****:*****:*****:*****:*****

SP|P12883|MYH7_HUMAN FCVTVNPKWLPVYTPEVVAAYRGKKRSEAPPHIFSISDNAYQYMLTDRENQSILITGES 180
SP|Q9BE39|MYH7_BOVIN FCVTINPKWLPVYNAEVVAAYRGKKRSEAPPHIFSISDNAYQYMLTDRENQSILITGES 180
SP|P02563|MYH6_RAT FCVTVNPKWLPVYNAEVVAAYRGKKRSEAPPHIFSISDNAYQYMLTDRENQSILITGES 179
      ****:*****_*****:*****:*****:*****:*****:*****:*****

SP|P12883|MYH7_HUMAN FTNEKLQQFFNHHMFVLEQEEYKKEGIEWTFIDFGMDLQACIDLIEKPMGIMSILEEEM 539
SP|Q9BE39|MYH7_BOVIN FTNEKLQQFFNHHMFVLEQEEYKKEGIEWEFIDFGMDLQACIDLIEKPMGIMSILEEEM 539
SP|P02563|MYH6_RAT FTNEKLQQFFNHHMFVLEQEEYKKEGIEWEFIDFGMDLQACIDLIEKPMGIMSILEEEM 539
      *****:*****:*****:*****:*****:*****:*****:*****

SP|P12883|MYH7_HUMAN MTNLRSTHPPHFVRCIIPNETKSPGVDNPLVMHQLRCNGVLEGIRICRKGFNRIYGF 718
SP|Q9BE39|MYH7_BOVIN MTNLRSTHPPHFVRCIIPNETKSPGVIDNPLVMHQLRCNGVLEGIRICRKGFNRIYGF 718
SP|P02563|MYH6_RAT MTNLRSTHPPHFVRCIIPNERKAPGVDNPLVMHQLRCNGVLEGIRICRKGFNRIYGF 719
      *****:*****:*****:*****:*****:*****:*****:*****

SP|P12883|MYH7_HUMAN RQRYRILNPAAIPEGQFIDSRKGAEKLLSSLDIDHNQYKFGHTKVFFKAGLLGLEEMRD 778
SP|Q9BE39|MYH7_BOVIN RQRYRILNPAAIPEGQFIDSRKGAEKLLGSLDIDHNQYKFGHTKVFFKAGLLGLEEMRD 778
SP|P02563|MYH6_RAT RQRYRILNPAAIPEGQFIDSGKGAEKLLGSLDIDHNQYKFGHTKVFFKAGLLGLEEMRD 779
      *****:*****:*****:*****:*****:*****:*****:*****

```

**Supplementary Figure 1.** Sequence alignment of human, bovine and rat cardiac myosin motor domain spanning residues 1-779. Residues forming the Omecantiv Mecarbil-binding site in PDB 4PA0 are highlighted in orange.

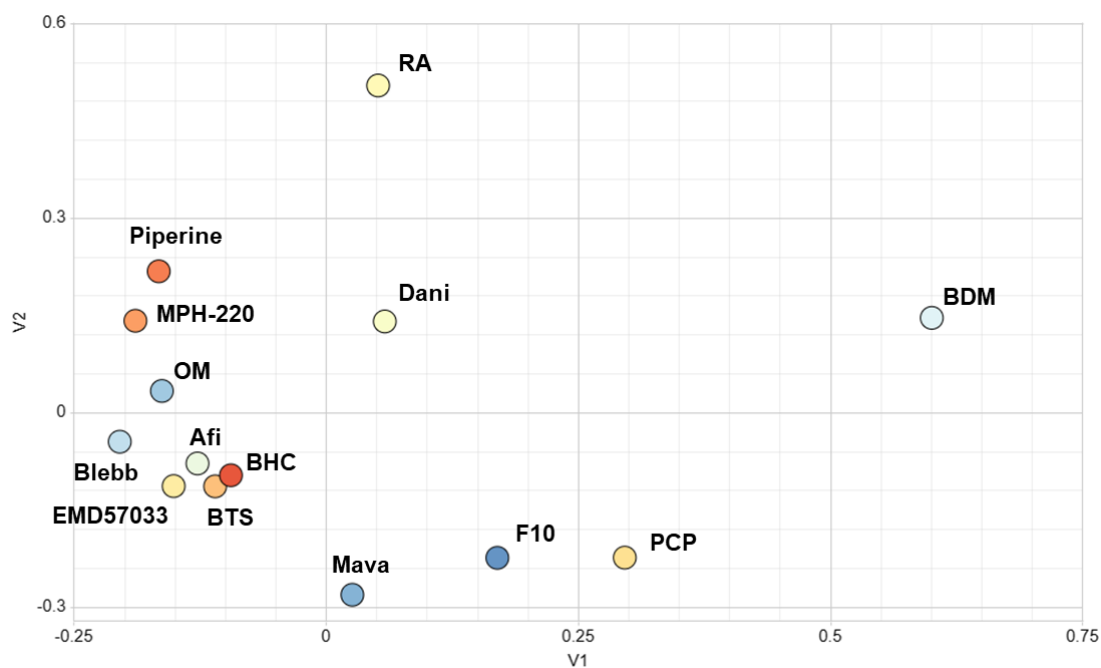

**Supplementary Figure 2.** Structural clustering of known small molecule myosin modulators using multi-dimensional scaling in ChemMineTools<sup>1</sup>. RA – retinoic acid; Dani – Danicamtiv; OM – Omecamtiv Mercarbil; Blebb – Blebbistatin; Afi – Aficamten; BTS - N-benzyl-p-toluene sulphonamide; Mava – Mavacamten; PCP – Pentaclorpseudiline; BHC - -((N-butylethanimidoyl)ethyl)-4-hydroxy-2H-chromen-2-one; BDM – 2,3 – Butadione monoxime.

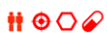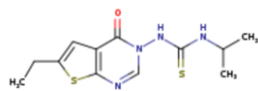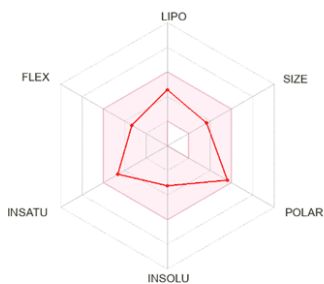

SMILES CCc1sc2c(c1)c(=O)n(cn2)NC(=S)NC(C)C

#### Physicochemical Properties

|                        |                       |
|------------------------|-----------------------|
| Formula                | C12H16N4OS2           |
| Molecular weight       | 296.41 g/mol          |
| Num. heavy atoms       | 19                    |
| Num. arom. heavy atoms | 9                     |
| Fraction Csp3          | 0.42                  |
| Num. rotatable bonds   | 5                     |
| Num. H-bond acceptors  | 2                     |
| Num. H-bond donors     | 2                     |
| Molar Refractivity     | 83.71                 |
| TPSA                   | 119.28 Å <sup>2</sup> |

#### Lipophilicity

|                            |      |
|----------------------------|------|
| Log $P_{o/w}$ (ILOGP)      | 2.53 |
| Log $P_{o/w}$ (XLOGP3)     | 2.47 |
| Log $P_{o/w}$ (WLOGP)      | 1.66 |
| Log $P_{o/w}$ (MLOGP)      | 1.68 |
| Log $P_{o/w}$ (SILICOS-IT) | 3.28 |
| Consensus Log $P_{o/w}$    | 2.32 |

#### Water Solubility

|                    |                                 |
|--------------------|---------------------------------|
| Log S (ESOL)       | -3.25                           |
| Solubility         | 1.65e-01 mg/ml ; 5.57e-04 mol/l |
| Class              | Soluble                         |
| Log S (Ali)        | -4.62                           |
| Solubility         | 7.12e-03 mg/ml ; 2.40e-05 mol/l |
| Class              | Moderately soluble              |
| Log S (SILICOS-IT) | -3.54                           |
| Solubility         | 8.53e-02 mg/ml ; 2.88e-04 mol/l |
| Class              | Soluble                         |

#### Pharmacokinetics

|                             |            |
|-----------------------------|------------|
| GI absorption               | High       |
| BBB permeant                | No         |
| P-gp substrate              | No         |
| CYP1A2 inhibitor            | Yes        |
| CYP2C19 inhibitor           | Yes        |
| CYP2C9 inhibitor            | Yes        |
| CYP2D6 inhibitor            | No         |
| CYP3A4 inhibitor            | No         |
| Log $K_p$ (skin permeation) | -6.35 cm/s |

#### Druglikeness

|                       |                  |
|-----------------------|------------------|
| Lipinski              | Yes; 0 violation |
| Ghose                 | Yes              |
| Veber                 | Yes              |
| Egan                  | Yes              |
| Muegge                | Yes              |
| Bioavailability Score | 0.55             |

#### Medicinal Chemistry

|                         |                             |
|-------------------------|-----------------------------|
| PAINS                   | 0 alert                     |
| Brenk                   | 1 alert: thiocarbonyl_group |
| Leadlikeness            | Yes                         |
| Synthetic accessibility | 3.33                        |

**Supplementary Figure 3.** Predicted ADMET properties of F10 using SwissADME<sup>2</sup>.

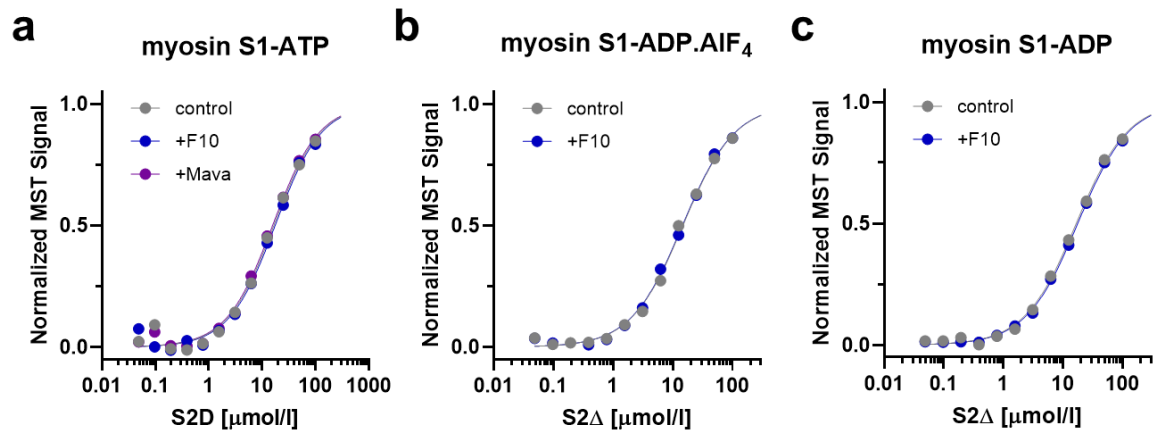

**Supplementary Figure 4.** Normalized MST binding curves for Alexa647-labelled bovine  $\beta$ -cardiac myosin S1 titrated against increasing concentrations of myosin S2 $\Delta$  in the absence (grey) and in the presence of either Mava (purple) or F10 (blue). Binding experiments were performed in the presence of 1 mmol L<sup>-1</sup> (a) ATP, (b) ADP.AIF<sub>4</sub> or (c) ADP.

Source data are provided as a Source Data file.

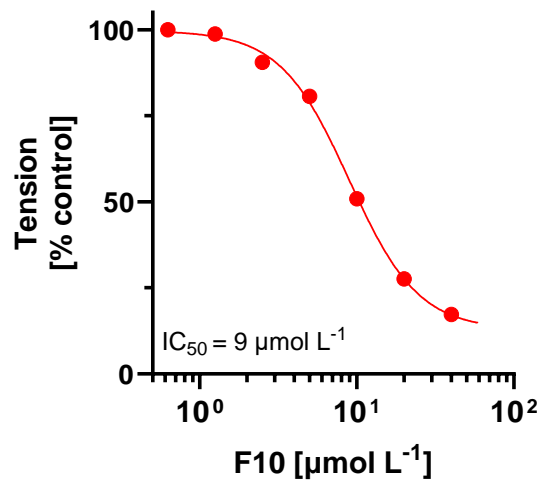

**Supplementary Figure 5.** Normalized dose-response curve for the effect of F10 on active isometric force at pCa 5.9 (corresponding to about 50% maximal activation).

Source data are provided as a Source Data file.

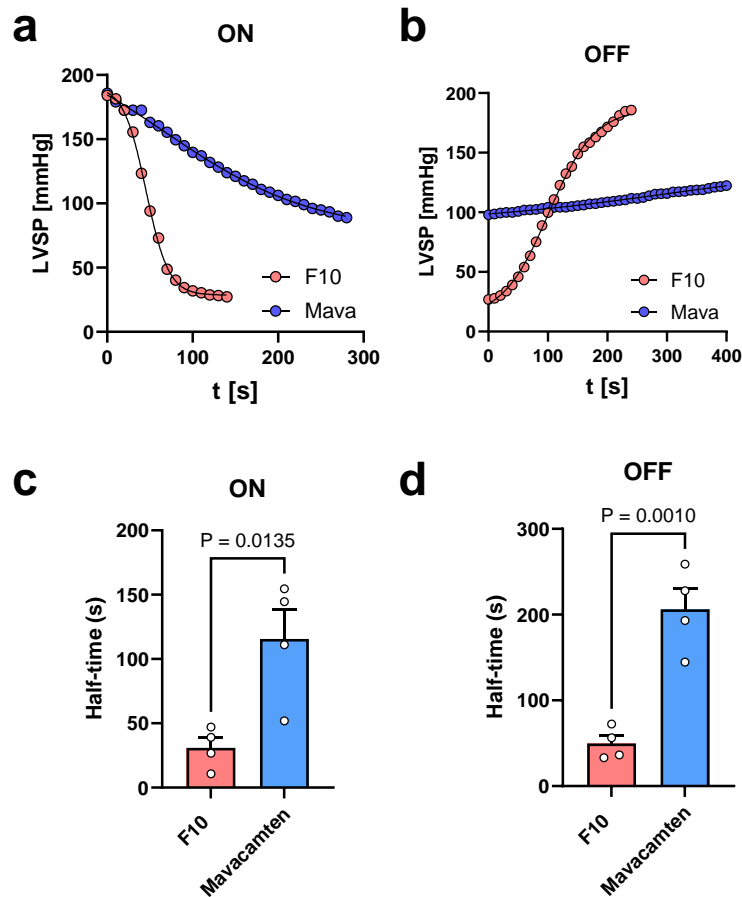

**Supplementary Figure 6.** Representative traces of left ventricular systolic (LVSP) during (a) perfusion of rat hearts with Krebs-Henseleit solution containing either F10 (red) or Mavacamten (blue), and (b) after washout. Continuous lines represent fit of data points to a Boltzmann sigmoidal function ( $LVSP = t + (Top - Bottom) / (1 + \exp((half-time - t) / Slope))$ ). Similar fits were applied to each individual heart and the extracted half-times for the ON and OFF rates were averaged and are shown in (c) and (d), respectively. In this fit, 'Top' was constrained to being equal to the steady-state LVSP immediately prior to drug application. Means  $\pm$  s.e.m.,  $n=4$  rat hearts. Statistical significance of differences between F10 and Mavacamten were assessed with two-tailed, unpaired student's t-test.

Source data are provided as a Source Data file.

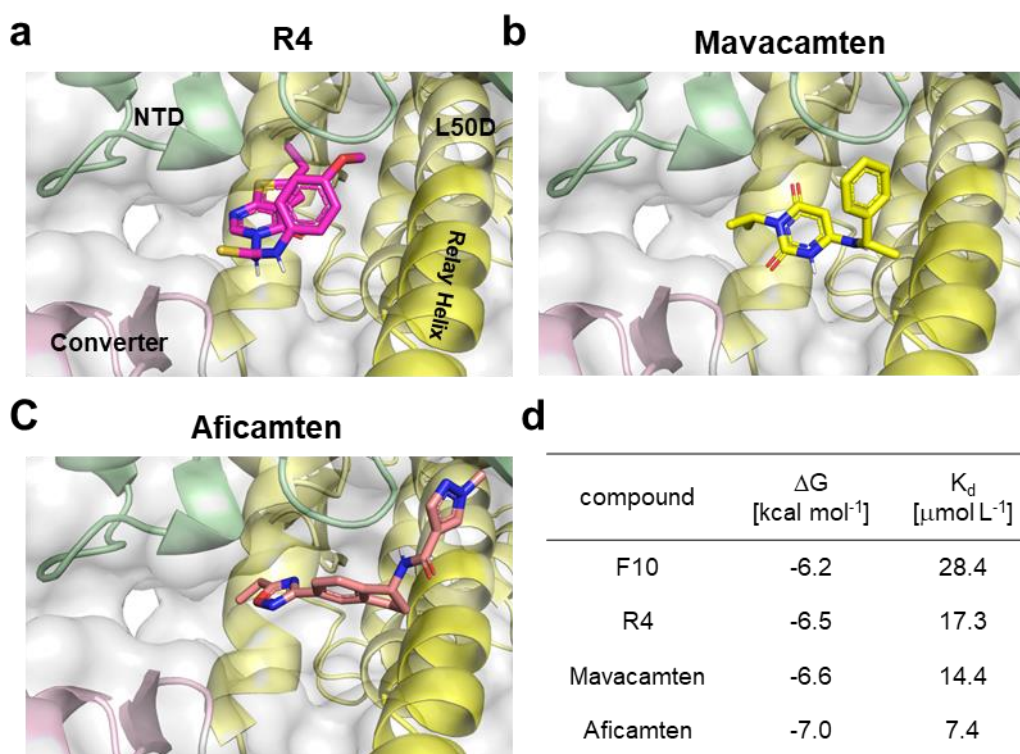

**Supplementary Figure 7.** Top scoring docking poses predicted by AutoDock Vina for (a) F10-derivative R4 (purple), (b) Mavacamten (yellow) and (c) Aficamten (pink) in the OM-binding pocket of human cardiac myosin S1. The N-terminal domain (NTD, green), converter (pink) and lower 50 ka domain (L50D, yellow) are labelled accordingly. (d) Calculated changes in free energy ( $\Delta G$ ) and steady dissociation constant  $K_d$ .



## Supplementary Information Tables and Table Legends

**Supplementary Table S1.** Summary of bi-exponential fits to mant-ATP chase experiments in bovine  $\beta$ -cardiac myosin S1, synthetic thick filament and cardiac myofibrils.

|                                             | Slow Phase [%]                               | $k_{fast}$ [ $s^{-1}$ ]                          | $k_{slow}$ [ $s^{-1}$ ]                           |
|---------------------------------------------|----------------------------------------------|--------------------------------------------------|---------------------------------------------------|
| <b><math>\beta</math>-cardiac myosin S1</b> |                                              |                                                  |                                                   |
| control<br>(n=5)                            | 21.4 $\pm$ 1.8                               | 0.0496 $\pm$ 0.0100                              | 0.0058 $\pm$ 0.0010                               |
| +Mava<br>(n=6)                              | 71.0 $\pm$ 5.5<br>(*P<0.0001)                | 0.0251 $\pm$ 0.0102<br>(*P=0.1672)               | 0.0035 $\pm$ 0.0002<br>(*P=0.0264)                |
| +F10<br>(n=6)                               | 69.8 $\pm$ 5.1<br>(*P<0.001)                 | 0.0454 $\pm$ 0.0057<br>(*P=0.9424)               | 0.0014 $\pm$ 0.0002<br>(*P<0.0001,<br>\$P=0.0292) |
| <b>Synthetic Myosin Filaments</b>           |                                              |                                                  |                                                   |
| Control<br>(n=5)                            | 22.9 $\pm$ 2.8                               | 0.0769 $\pm$ 0.0163                              | 0.0046 $\pm$ 0.0007                               |
| +Mava<br>(n=7)                              | 71.2 $\pm$ 2.4<br>(*P<0.0001)                | 0.0593 $\pm$ 0.0188 <sup>ns</sup><br>(*P=0.9270) | 0.0033 $\pm$ 0.0007<br>(*P=0.3223)                |
| +F10<br>(n=7)                               | 63.2 $\pm$ 4.2<br>(*P<0.0001)                | 0.0784 $\pm$ 0.0208<br>(*P=0.9528)               | 0.0027 $\pm$ 0.0005<br>(*P=0.2187)                |
| <b>Cardiac myofibrils</b>                   |                                              |                                                  |                                                   |
| control<br>(n=5)                            | 25.4 $\pm$ 0.2                               | 0.0719 $\pm$ 0.0193                              | 0.0053 $\pm$ 0.0009                               |
| +Mava<br>(n=6)                              | 46.6 $\pm$ 8.0<br>(*P<0.0285)                | 0.0637 $\pm$ 0.0271<br>(*P=0.9529)               | 0.0027 $\pm$ 0.0009<br>(*P=0.0734)                |
| +F10<br>(n=6)                               | 67.8 $\pm$ 3.6<br>(*P<0.0001,<br>\$P=0.0221) | 0.0552 $\pm$ 0.0106<br>(*P=0.8080)               | 0.0021 $\pm$ 0.0002<br>(*P=0.0185)                |

Means s.e.m. with the number of independent experiments (n) shown for each condition. Statistical significance of differences between values was assessed with a one-way ANOVA followed by Tukey's post-hoc test. P-values are shown in brackets with \*P for F10 or Mava vs control, and \$P for Mava vs F10. Source data are provided as a Source Data file.

**Supplementary Table S2.** Summary for the effect of F10 on rat ventricular trabeculae mechanics and fluorescence polarization.

|                                             | <b>control</b> | <b>F10</b>    | <b>P value</b> |
|---------------------------------------------|----------------|---------------|----------------|
| <b>T<sub>min</sub> (mN mm<sup>-2</sup>)</b> | 3.4 ± 0.5      | 3.5 ± 0.6     | 0.8561         |
| <b>T<sub>max</sub> (mN mm<sup>-2</sup>)</b> | 69.6 ± 2.6     | 15.6 ± 1.8    | <0.0001        |
| <b>&lt;P<sub>2</sub>&gt;<sub>min</sub></b>  | 0.144 ± 0.003  | 0.193 ± 0.009 | 0.0319         |
| <b>&lt;P<sub>2</sub>&gt;<sub>max</sub></b>  | 0.078 ± 0.008  | 0.207 ± 0.023 | 0.0147         |
| <b>pCa<sub>50</sub></b>                     | 5.88 ± 0.02    | 5.69 ± 0.01   | 0.0137         |
| <b>n<sub>H</sub></b>                        | 7.60 ± 0.05    | 5.57 ± 0.33   | 0.0205         |
| <b>k<sub>tr</sub> [s<sup>-1</sup>]</b>      | 12.0 ± 1.9     | 35.1 ± 1.3    | 0.0056         |

Means s.e.m., n=3-5 trabeculae experiments. Statistical significance of differences between control and F10 treatment was assessed with a two-tailed, paired student's t-test.

Source data are provided as a Source Data file.

**Supplementary Table S3.** Summary for the effects of 20  $\mu\text{mol L}^{-1}$  F10 on haemodynamic parameters of Langendorff-perfused rat hearts.

|                                                               | <b>Baseline</b>     | <b>20 <math>\mu\text{mol L}^{-1}</math> F10</b> | <b>P value</b> |
|---------------------------------------------------------------|---------------------|-------------------------------------------------|----------------|
| <b>LVSP [mmHg]</b>                                            | 168.0 $\pm$ 8.5     | 58.3 $\pm$ 2.2                                  | 0.0016         |
| <b>LVEDP [mmHg]</b>                                           | 1.9 $\pm$ 0.2       | 22.0 $\pm$ 1.1                                  | 0.0046         |
| <b>dP dt<sub>max</sub><sup>-1</sup> [mmHg s<sup>-1</sup>]</b> | 3978.8 $\pm$ 108.0  | 1329.0 $\pm$ 153.8                              | 0.0004         |
| <b>dP dt<sub>min</sub><sup>-1</sup> [mmHg s<sup>-1</sup>]</b> | -3352.4 $\pm$ 134.4 | -1300.0 $\pm$ 104.2                             | 0.0014         |
| <b>Heart rate [bpm]</b>                                       | 303 $\pm$ 8         | 300 $\pm$ 4                                     | 0.7277         |
| <b>Coronary flow [ml min<sup>-1</sup>]</b>                    | 15.6 $\pm$ 1.7      | 16.7 $\pm$ 2.3                                  | 0.6643         |

Means  $\pm$  s.e.m. for n = 4 rat hearts. Statistical significance of differences between baseline and F10 was assessed with a two-tailed, paired student's t-test.

Source data are provided as a Source Data file.

## Supplementary Information References

- 1 Backman, T. W., Cao, Y. & Girke, T. ChemMine tools: an online service for analyzing and clustering small molecules. *Nucleic Acids Res* **39**, W486-491, doi:10.1093/nar/gkr320 (2011).
- 2 Daina, A., Michielin, O. & Zoete, V. SwissADME: a free web tool to evaluate pharmacokinetics, drug-likeness and medicinal chemistry friendliness of small molecules. *Sci Rep* **7**, 42717, doi:10.1038/srep42717 (2017).
